# Supplementary material for: High electrical conduction of the Sb square net in an anti-ThCr2Si2 type La2O2Sb thin film grown by multilayer solid-phase epitaxy
Source: Royal Society of Chemistry journal article supplement (doi:10.1039/d1tc00747e), 2021-01-01
Supplement: d1tc00747e1.pdf [file d1tc00747e1.pdf]

**Supplementary Information**

**High electrical conduction of Sb square net in anti-ThCr<sub>2</sub>Si<sub>2</sub> type La<sub>2</sub>O<sub>2</sub>Sb thin  
film grown by multilayer solid-phase epitaxy**

Yuki Yamamoto,<sup>a</sup> Hideyuki Kawasoko,<sup>a</sup> and Tomoteru Fukumura<sup>\*a,b</sup>

<sup>a</sup> *Department of Chemistry, Graduate School of Science, Tohoku University, Sendai 980-8578, Japan*

<sup>b</sup> *Advanced Institute for Materials Research and Core Research Cluster, Tohoku University, Sendai 980-8577, Japan*

\* [tomoteru.fukumura.e4@tohoku.ac.jp](mailto:tomoteru.fukumura.e4@tohoku.ac.jp)

**Table S1** Summary of growth condition, chemical composition, crystal structure parameters, and the correspondence with figures for the La<sub>2</sub>O<sub>2</sub>Sb epitaxial thin films.

| Sample | Multilayer precursor<br>(nominal composition)                                                                                                                                 | $T_g$   | Heating<br>time | Sb/La molar<br>ratio | <i>a</i> -axis<br>length (Å) | <i>c</i> -axis<br>length (Å) | FWHM of<br>RC (deg)        | Figures                                       |
|--------|-------------------------------------------------------------------------------------------------------------------------------------------------------------------------------|---------|-----------------|----------------------|------------------------------|------------------------------|----------------------------|-----------------------------------------------|
| A      | [La <sub>2</sub> O <sub>3</sub> (5.1 nm)/La (19 nm)/La <sub>2</sub> O <sub>3</sub> (5.1 nm)/Sb (27 nm)] <sub>2</sub><br>(La <sub>2</sub> O <sub>1.3</sub> Sb <sub>1.1</sub> ) | 650 °C  | 11 min          | 0.44                 | -                            | -                            | -                          | Fig. 2a, 3, S3                                |
| B      |                                                                                                                                                                               | 750 °C  |                 | 0.45                 | 4.099                        | 13.84                        | 1.73                       | Fig. 2a, 3, S3                                |
| C      |                                                                                                                                                                               | 850 °C  |                 | 0.42                 | 4.097                        | 13.91                        | 0.33                       | Fig. 2a, 3, 6, S1b, S1c, S1d, S2b, S3, S5, S6 |
| D      |                                                                                                                                                                               |         |                 | 0.44                 | 4.080                        | 13.94                        | 0.17                       | Fig. S1c, S2b, S3, S4, S5, S6                 |
| E      | [La <sub>2</sub> O <sub>3</sub> (5.5 nm)/La (18 nm)/La <sub>2</sub> O <sub>3</sub> (5.5 nm)/Sb (27 nm)] <sub>2</sub><br>(La <sub>2</sub> O <sub>1.4</sub> Sb <sub>1.1</sub> ) | 850 °C  | 11 min          | 0.45                 | 4.067                        | 13.94                        | 0.35                       | Fig. 2b, 2c, 5, S1b, S4                       |
| F      | 0.44                                                                                                                                                                          |         |                 | 4.078                | 13.95                        | 0.17                         | Fig. S1a, S1b, S1c, S5, S6 |                                               |
| G      | [La <sub>2</sub> O <sub>3</sub> (6.2 nm)/La (16 nm)/La <sub>2</sub> O <sub>3</sub> (6.2 nm)/Sb (27 nm)] <sub>2</sub><br>(La <sub>2</sub> O <sub>1.5</sub> Sb <sub>1.1</sub> ) |         |                 | 30 sec               | 0.35                         | -                            | -                          | Fig. S1a, S1c                                 |
| H      |                                                                                                                                                                               |         | 60 min          | 0.36                 | 4.084                        | 13.84                        | 0.16                       | Fig. S1a, S1c                                 |
| I      | [La <sub>2</sub> O <sub>3</sub> (5.1 nm)/La (19 nm)/La <sub>2</sub> O <sub>3</sub> (5.1 nm)/Sb (27 nm)] <sub>2</sub><br>(La <sub>2</sub> O <sub>1.3</sub> Sb <sub>1.1</sub> ) | 950 °C  | 11 min          | 0.40                 | 4.078                        | 13.89                        | 0.13                       | Fig. 2a, 3, 4, 6, S2a, S3, S5                 |
| J      |                                                                                                                                                                               |         |                 | 0.26                 | 4.084                        | 13.87                        | 0.37                       | Fig. S2a, S3                                  |
| K      | [La <sub>2</sub> O <sub>3</sub> (5.1 nm)/La (19 nm)/La <sub>2</sub> O <sub>3</sub> (5.1 nm)/Sb (27 nm)] <sub>2</sub><br>(La <sub>2</sub> O <sub>1.3</sub> Sb <sub>1.1</sub> ) | 1050 °C |                 | 0.00                 | -                            | -                            | -                          | Fig. 2a, 3, S3                                |

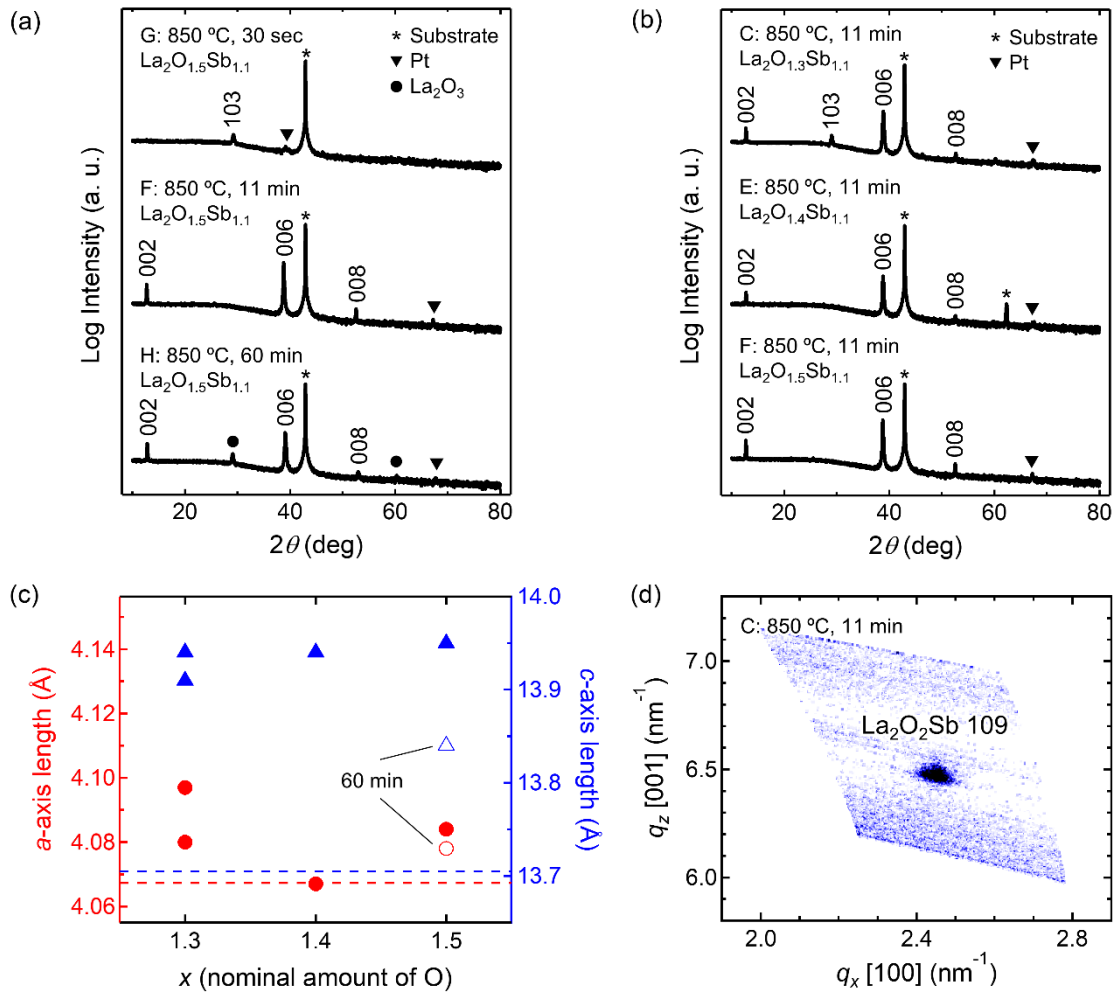

**Fig. S1** Out-of-plane XRD patterns of the films on MgO (001) substrates for different (a) heating time (30 sec, 11 and 60 min) and (b) nominal amount of oxygen with  $T_g = 850^\circ\text{C}$ . The chemical formulae denote the nominal composition. (c) The  $a$ - (circle) and  $c$ - axis lengths (triangle) as a function of nominal amount of oxygen. Red and blue dashed lines represent  $a$ - and  $c$ - axis lengths of  $\text{La}_2\text{O}_2\text{Sb}$  bulk polycrystal, respectively.<sup>S1</sup> (d) Reciprocal space mapping of the  $\text{La}_2\text{O}_2\text{Sb}$  epitaxial thin film with  $T_g = 850^\circ\text{C}$ .

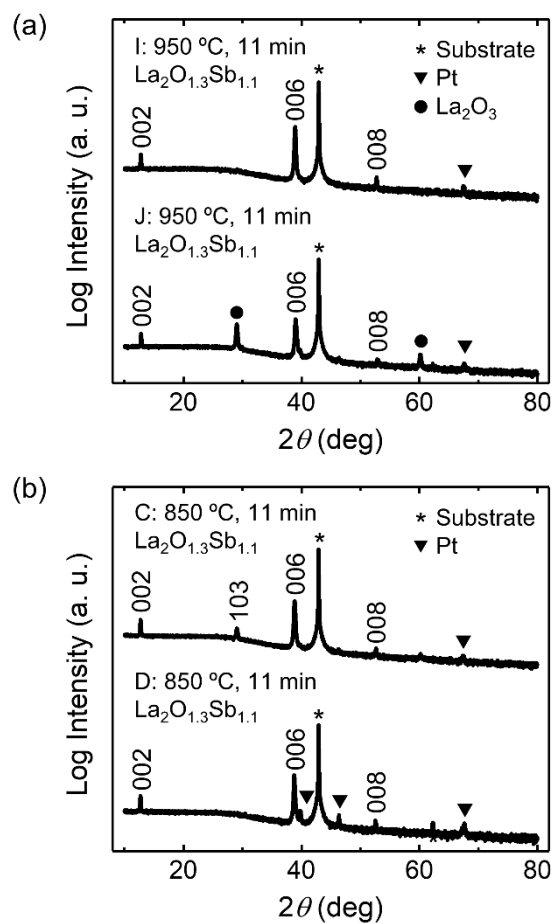

**Fig. S2** Out-of-plane XRD patterns of the obtained films on MgO (001) substrates with (a)  $T_g = 950$  °C and (b) 850 °C for two different runs.

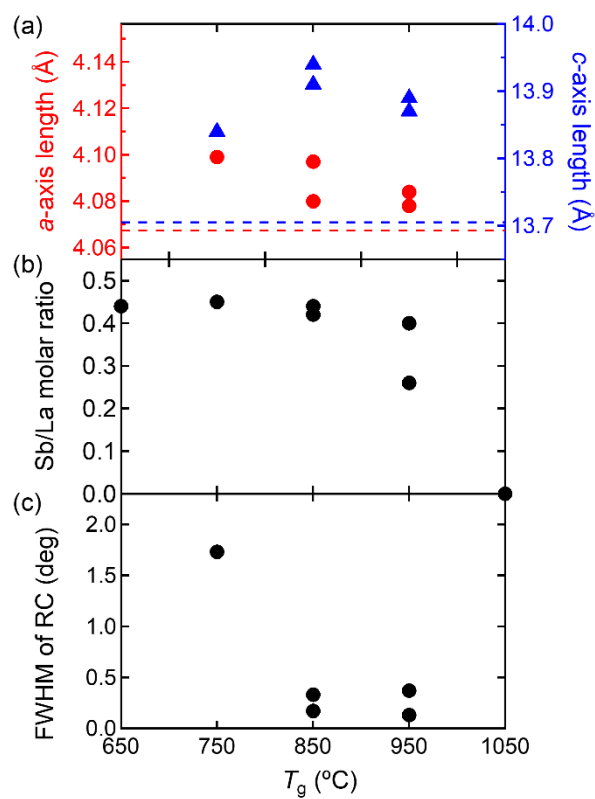

**Fig. S3** Growth temperature ( $T_g$ ) dependence of (a) *a*- (circle) and *c*- axis lengths (triangle), (b) Sb/La molar ratio, and (c) FWHM of rocking curve (RC) for 006 diffraction peak of the  $\text{La}_2\text{O}_2\text{Sb}$  epitaxial thin films. Red and blue dashed lines in (a) denote *a*- and *c*- axis lengths of  $\text{La}_2\text{O}_2\text{Sb}$  bulk polycrystal, respectively.

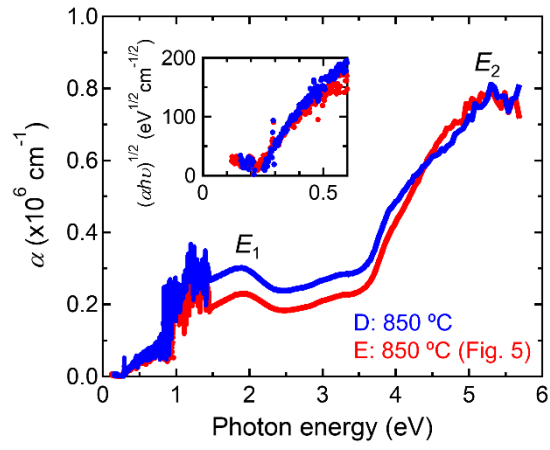

**Fig. S4** Absorption coefficient spectra for two different  $\text{La}_2\text{O}_2\text{Sb}$  epitaxial thin films with  $T_g = 850\text{ }^\circ\text{C}$ .

Upper inset shows Tauc plot of the absorption edge.

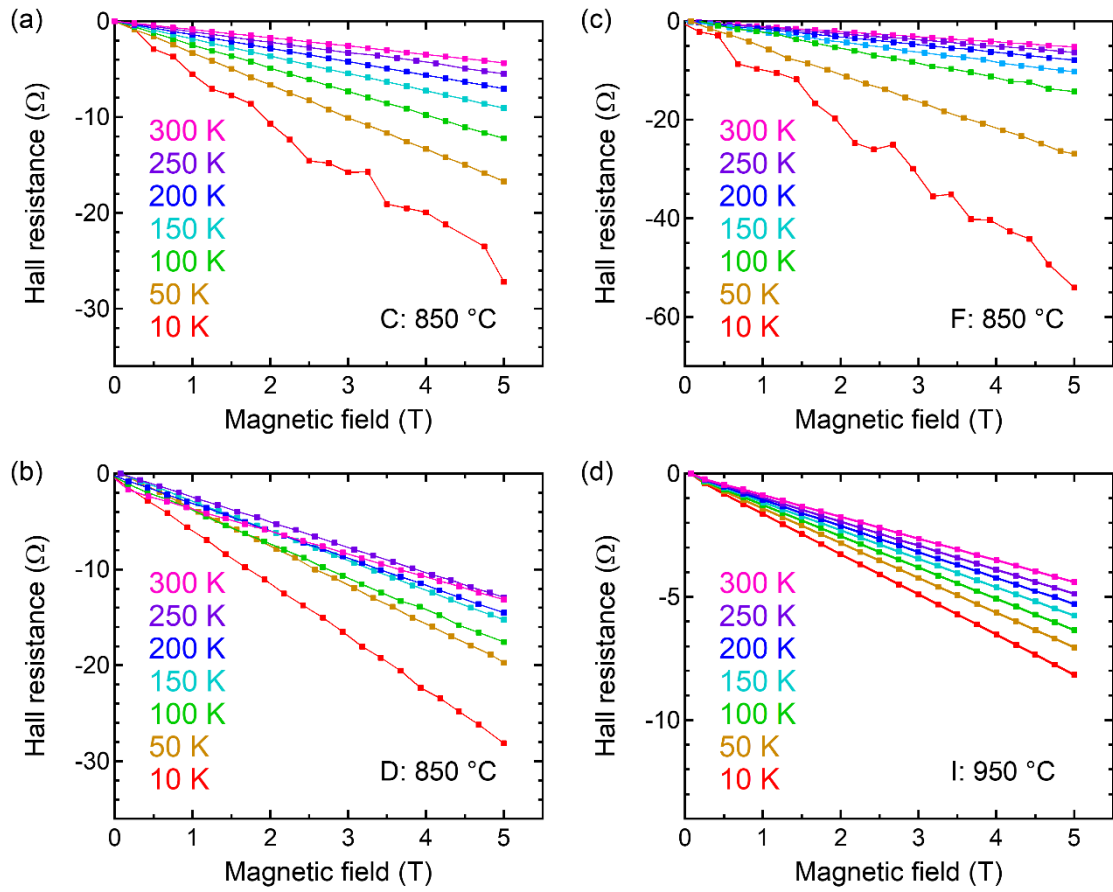

**Fig. S5** Magnetic field dependence of Hall resistance for the  $\text{La}_2\text{O}_2\text{Sb}$  epitaxial thin films with (a)–(c)  $T_g = 850\text{ }^\circ\text{C}$  and (d)  $950\text{ }^\circ\text{C}$ . The data scattering in the Hall resistance at 10 K in (a) and (c) was caused by the measurement limit due to the high resistance of the films.

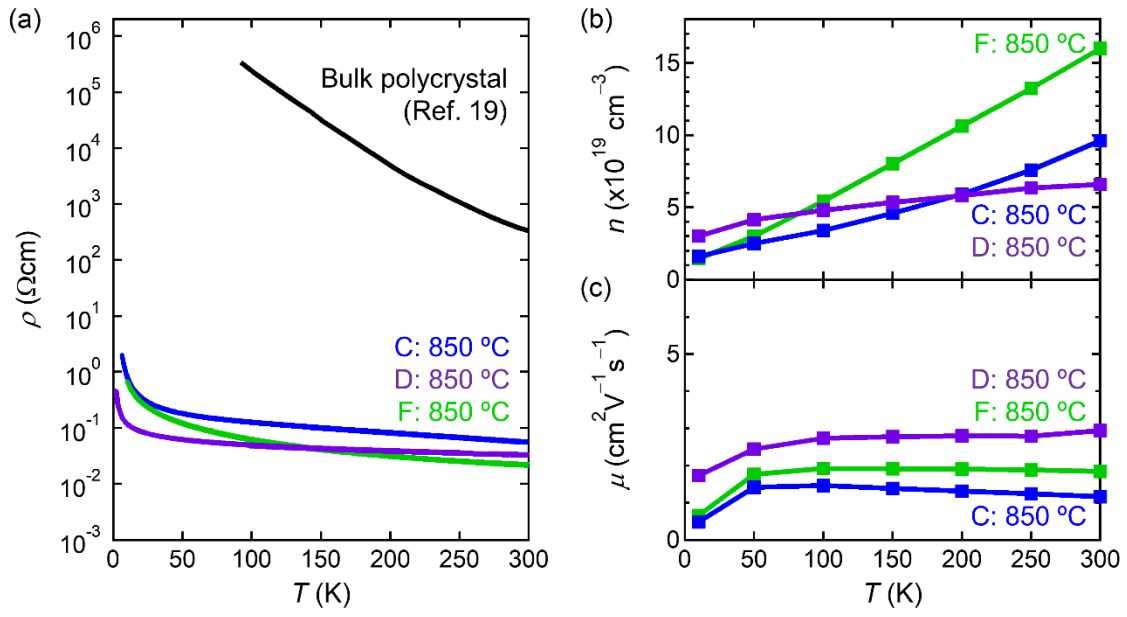

**Fig. S6** Temperature dependence of (a) resistivity, (b) carrier density, and (c) carrier mobility for the La<sub>2</sub>O<sub>2</sub>Sb epitaxial thin films with  $T_g = 850$  °C.



References in supplementary information

- S1. P. L. Wang, T. Kolodiaznyi, J. Yao, Y. Mozharivskyj, *J. Am. Chem. Soc.* 2012, **134**, 1426.
